# Supplementary material for: Lunar gravity prevents skeletal muscle atrophy but not myofiber type shift in mice
Source: PubMed Central journal article supplement (PMC10121599; doi:10.1038/s42003-023-04769-3), 2023-04-21
Supplement: 42003_2023_4769_MOESM2_ESM.pdf [file 42003_2023_4769_MOESM2_ESM.pdf]

## Description of Additional Supplementary Files

**File name:** Supplementary Data 1

**Description:** The source data behind the graphs in the paper

**File name:** Supplementary Data 2

**Description:** The Python and R code which are used in the paper figures

**File name:** Supplementary Movie 1

**Description:** Onboard habitation of mouse habitat unit (MHU)-1, MHU-4, and MHU-5 mice at the midpoint of the mission (day 16) (10 s). Top panel: MHU-1 mice subjected to microgravity; second panel from the top: MHU4\_PG mice; third panel from the top: MHU-5\_PG mice; bottom panel: MHU-1 mice subjected to 1 g artificial gravity.
