# Supplementary material for: Lunar gravity prevents skeletal muscle atrophy but not myofiber type shift in mice
Source: PubMed Central journal article supplement (PMC10121599; doi:10.1038/s42003-023-04769-3), 2023-04-21
Supplement: 42003_2023_4769_MOESM4_ESM.pdf [file 42003_2023_4769_MOESM4_ESM.pdf]

## Lunar gravity prevents skeletal muscle atrophy but not myofiber type shift in mice

Takuto Hayashi<sup>1,2</sup>, Ryo Fujita<sup>3</sup>, Risa Okada<sup>4</sup>, Michito Hamada<sup>1,5</sup>, Riku Suzuki<sup>1,6</sup>, Sayaka Fuseya<sup>1</sup>, James Leckey<sup>1</sup>, Maho Kanai<sup>1,6</sup>, Yuri Inoue<sup>1,2</sup>, Shunya Sadaki<sup>1,7</sup>, Ayano Nakamura<sup>1,8</sup>, Yui Okamura<sup>1,8</sup>, Chikara Abe<sup>9</sup>, Hironobu Morita<sup>5,10</sup>, Tatsuya Aiba<sup>4</sup>, Teruhiro Senkoji<sup>4</sup>, Michihiko Shimomura<sup>4,5</sup>, Maki Okada<sup>4</sup>, Daisuke Kamimura<sup>4</sup>, Akane Yumoto<sup>4,5</sup>, Masafumi Muratani<sup>5,11</sup>, Takashi Kudo<sup>1,5\*</sup>, Dai Shiba<sup>4,5\*</sup>, Satoru Takahashi<sup>1,5\*</sup>

<sup>1</sup>Laboratory Animal Resource Center in Transborder Medical Research Center, and Department of Anatomy and Embryology, Faculty of Medicine, University of Tsukuba, Ibaraki 305-8575, Japan

<sup>2</sup>Doctoral Program in Biomedical Sciences, Graduate School of Comprehensive Human Sciences, University of Tsukuba, Ibaraki 305-8575, Japan

<sup>3</sup>Division of Regenerative Medicine, Transborder Medical Research Center, Faculty of Medicine, University of Tsukuba, Ibaraki 305-8575, Japan

<sup>4</sup>JEM Utilization Center, Human Spaceflight Technology Directorate, Japan Aerospace Exploration Agency (JAXA), Ibaraki 305-8505, Japan

<sup>5</sup>Mouse Epigenetics Project, ISS/Kibo experiment, JAXA, Ibaraki 305-8505, Japan

<sup>6</sup>Ph.D. Program in Human Biology, School of Integrative and Global Majors, University of Tsukuba, Ibaraki 305-8575, Japan

<sup>7</sup>Ph.D. Program in Humanics, School of Integrative and Global Majors, University of Tsukuba, Ibaraki 305-8575, Japan

<sup>8</sup>College of Medicine, School of Medicine and Health Sciences, University of Tsukuba, Ibaraki 305-8575, Japan

<sup>9</sup>Department of Physiology, Gifu University Graduate School of Medicine, Gifu, 501-1194, Japan

<sup>10</sup>Department of Nutrition Management, Tokai Gakuin University, Gifu, 504-8511, Japan

<sup>11</sup>Department of Genome Biology, Transborder Medical Research Center, Faculty of Medicine, University of Tsukuba, Ibaraki 305-8575, Japan

## Code of Python for PCA plots.

```
import math
import numpy as np
import pandas as pd
import matplotlib.pyplot as plt
from sklearn.decomposition import PCA
from sklearn.preprocessing import scale

df = pd.read_excel(".xlsx",index_col=0)
Expression = df.iloc[:, df.columns.str.contains('Normalized')].astype(float)
print(Expression.shape)
print(Expression.max())
Expression.head()

Expression = Expression.sort_index(axis=1)
Expression.head()
print(Expression.max())

df_count_tpm = Expression.copy()
tpm = scale(df_count_tpm.T)
pca = PCA(n_components=3)
pca.fit(tpm)

principalComponents = pca.fit_transform(tpm)
principalDf = pd.DataFrame(data = principalComponents
                          , columns = ['PC 1', 'PC 2', 'PC 3'], index=df_count_tpm.T.index)
principalDf["target"] = ['4-PG','4-PG','4-PG','4-GC','4-GC','4-GC',
                        '5-PG','5-PG','5-PG','5-GC','5-GC','5-GC',
                        '1-AG','1-AG','1-AG','1-MG','1-MG','1-MG','1-GC','1-GC','1-
GC']
principalDf.head(len(principalDf))
```

```
print( pca.components_.round(4))
print( pca.mean_)
print(pca.get_covariance())
print(pca.explained_variance_ratio_)
print(sum(pca.explained_variance_ratio_))
print([math.sqrt(u) for u in pca.explained_variance_])
fuka = (pca.components_*np.c_[np.sqrt(pca.explained_variance_)]).T
print(fuka.round(4))
```

```
plt.style.use('default')
fig = plt.figure(figsize = (5,5))
ax = fig.add_subplot(1,1,1)
ax.set_xlabel('PC 1', fontsize = 15)
ax.set_ylabel('PC 2', fontsize = 15)
```

```
ax.set_title('2 component PCA', fontsize = 20)
for target, color in zip(targets,colors):
    indicesToKeep = principalDf['target'] == target
    ax.scatter(principalDf.loc[indicesToKeep, 'PC 1']
               , principalDf.loc[indicesToKeep, 'PC 2']
               , c = color
               , s = 50)
```

```
ax.legend(targets,bbox_to_anchor=(1.7, 1), fontsize=13)
ax.grid()
plt.show()
```

## Code of R for dotplots of GO analysis results.

```
library(ReactomePA)

sample_data<-read.csv("c4.csv", header=T, fileEncoding="utf-8")

Enrichment <- sample_data$Padj
library(ggplot2)
Enrichment <- -log10(sample_data$Padj)
p = ggplot(sample_data, aes(x = Ratio, y = reorder(Term, Enrichment)))
p = p + geom_point()
p = p + geom_point(aes(size = Counts)) + labs (x = "Ratio", y = "Term")
pbubble = p + geom_point(aes(size = Counts, color = Enrichment))
pr = pbubble + scale_color_gradient(low = "purple", high = "orange")
pr
```
